# Supplementary material for: Effect of radiochemotherapy on the cognitive function and diffusion tensor and perfusion weighted imaging for high-grade gliomas: A prospective study
Source: PubMed Central journal article supplement (PMC6461706; doi:10.1038/s41598-019-42321-8), 2019-04-12
Supplement: 41598_2019_42321_MOESM1_ESM.pdf [file 41598_2019_42321_MOESM1_ESM.pdf]

## Supplementary Information for

Effect of radiochemotherapy on the cognitive function and diffusion tensor and perfusion weighted imaging for high-grade gliomas: A prospective study

Yiying Bian<sup>1</sup>, Li Meng<sup>2</sup>, Jianghua Peng<sup>1</sup>, Junfeng Li<sup>1</sup>, Rui Wei<sup>1</sup>, Lei Huo<sup>3</sup>,  
Huan Yang<sup>4</sup>, Ying Wang<sup>5</sup>, Jun Fu<sup>1</sup>, Liangfang Shen<sup>1</sup>, Jidong Hong<sup>1</sup>

Department of <sup>1</sup>Oncology, <sup>2</sup> Radiology, <sup>3</sup>Neurosurgery, <sup>4</sup>Neurology,  
<sup>5</sup>Pathology, Xiangya Hospital, Central South University, Changsha,  
410008 Hunan, PR China. Correspondence and requests for materials  
should be addressed to J.H. (email: [hongjidong1966@126.com](mailto:hongjidong1966@126.com))

Table S1 Correlation analysis between parameters of DTI and PWI and dose to brain regions (End of radiotherapy)

| Parameters         | Location                    | Dmax   |       | Dmean  |       |
|--------------------|-----------------------------|--------|-------|--------|-------|
|                    |                             | r      | P     | r      | P     |
| FA                 |                             |        |       |        |       |
|                    | Contralateral frontal lobe  | -0.227 | 0.365 | -0.226 | 0.367 |
|                    | Contralateral temporal lobe | -0.517 | 0.028 | 0.437  | 0.070 |
|                    | Contralateral hippocampus   | -0.309 | 0.213 | -0.284 | 0.254 |
|                    | Ipsilateral hippocampus     | -0.427 | 0.077 | -0.339 | 0.168 |
|                    | Posterior cingulate gyrus   | 0.135  | 0.594 | 0.148  | 0.558 |
|                    | Genu of corpus callosum     | -0.093 | 0.714 | -0.160 | 0.525 |
|                    | Splenium of corpus callosum | -0.466 | 0.051 | -0.489 | 0.039 |
| rCBV (ml/100g)     |                             |        |       |        |       |
|                    | Contralateral frontal lobe  | 0.986  | 0.006 | 0.155  | 0.539 |
|                    | Contralateral temporal lobe | 0.155  | 0.540 | 0.281  | 0.260 |
|                    | Contralateral hippocampus   | 0.061  | 0.809 | 0.112  | 0.657 |
|                    | Ipsilateral hippocampus     | 0.054  | 0.830 | -0.133 | 0.598 |
|                    | Posterior cingulate gyrus   | -0.043 | 0.865 | -0.082 | 0.745 |
|                    | Genu of corpus callosum     | -0.058 | 0.818 | -0.044 | 0.861 |
|                    | Splenium of corpus callosum | 0.127  | 0.617 | 0.144  | 0.569 |
| rCBF (ml/100g/min) |                             |        |       |        |       |
|                    | Contralateral frontal lobe  | -0.263 | 0.293 | -0.264 | 0.291 |
|                    | Contralateral temporal lobe | 0.131  | 0.605 | 0.096  | 0.705 |
|                    | Contralateral hippocampus   | 0.113  | 0.656 | 0.130  | 0.608 |

|        |                             |        |       |        |       |
|--------|-----------------------------|--------|-------|--------|-------|
|        | Ipsilateral hippocampus     | -0.132 | 0.627 | -0.121 | 0.633 |
|        | Posterior cingulate gyrus   | -0.074 | 0.771 | -0.100 | 0.694 |
|        | Genu of corpus callosum     | <0.001 | 0.999 | -0.047 | 0.852 |
|        | Splenium of corpus callosum | -0.246 | 0.326 | -0.169 | 0.503 |
| MTT(s) |                             |        |       |        |       |
|        | Contralateral frontal lobe  | 0.237  | 0.344 | 0.320  | 0.195 |
|        | Contralateral temporal lobe | -0.036 | 0.887 | -0.078 | 0.757 |
|        | Contralateral hippocampus   | 0.077  | 0.761 | 0.177  | 0.481 |
|        | Ipsilateral hippocampus     | 0.107  | 0.672 | -0.127 | 0.616 |
|        | Posterior cingulate gyrus   | -0.230 | 0.358 | -0.179 | 0.476 |
|        | Genu of corpus callosum     | -0.267 | 0.285 | -0.200 | 0.425 |
|        | Splenium of corpus callosum | 0.305  | 0.219 | 0.276  | 0.268 |
| TTP(s) |                             |        |       |        |       |
|        | Contralateral frontal lobe  | 0.071  | 0.778 | 0.203  | 0.419 |
|        | Contralateral temporal lobe | 0.083  | 0.745 | -0.008 | 0.974 |
|        | Contralateral hippocampus   | 0.008  | 0.975 | 0.012  | 0.962 |
|        | Ipsilateral hippocampus     | 0.216  | 0.390 | -0.025 | 0.922 |
|        | Posterior cingulate gyrus   | -0.048 | 0.849 | 0.017  | 0.947 |
|        | Genu of corpus callosum     | 0.003  | 0.991 | 0.089  | 0.725 |
|        | Splenium of corpus callosum | 0.372  | 0.129 | 0.377  | 0.123 |

r: coefficient of correlation, Dmax: Maximum dose, Dmean: Mean dose, FA: Fractional anisotropy fractional anisotropy, rCBF: regional cerebral blood flow, rCBV: regional cerebral blood volume, MTT: mean transit time, TTP: time to peak

Table S2 Correlation analysis between parameters of DTI and PWI and dose to brain regions (3 months after radiotherapy)

| Parameters         | Location                    | Dmax   |       | Dmean  |       |
|--------------------|-----------------------------|--------|-------|--------|-------|
|                    |                             | r      | P     | r      | P     |
| FA                 |                             |        |       |        |       |
|                    | Contralateral frontal lobe  | 0.150  | 0.554 | 0.136  | 0.590 |
|                    | Contralateral temporal lobe | 0.167  | 0.507 | 0.127  | 0.615 |
|                    | Contralateral hippocampus   | -0.334 | 0.176 | -0.234 | 0.350 |
|                    | Ipsilateral hippocampus     | -0.683 | 0.002 | -0.532 | 0.023 |
|                    | Posterior cingulate gyrus   | -0.438 | 0.069 | -0.428 | 0.077 |
|                    | Genu of corpus callosum     | -0.424 | 0.080 | -0.499 | 0.035 |
|                    | Splenium of corpus callosum | -0.374 | 0.126 | -0.375 | 0.126 |
| rCBV (ml/100g)     |                             |        |       |        |       |
|                    | Contralateral frontal lobe  | -0.023 | 0.928 | 0.110  | 0.663 |
|                    | Contralateral temporal lobe | 0.116  | 0.646 | 0.124  | 0.624 |
|                    | Contralateral hippocampus   | -0.132 | 0.600 | -0.038 | 0.881 |
|                    | Ipsilateral hippocampus     | 0.080  | 0.754 | 0.112  | 0.659 |
|                    | Posterior cingulate gyrus   | -0.134 | 0.597 | -0.428 | 0.077 |
|                    | Genu of corpus callosum     | -0.244 | 0.329 | -0.226 | 0.366 |
|                    | Splenium of corpus callosum | -0.384 | 0.115 | -0.316 | 0.202 |
| rCBF (ml/100g/min) |                             |        |       |        |       |
|                    | Contralateral frontal lobe  | -0.019 | 0.939 | -0.074 | 0.771 |
|                    | Contralateral temporal lobe | 0.123  | 0.627 | 0.017  | 0.946 |

|        |                             |        |       |        |       |
|--------|-----------------------------|--------|-------|--------|-------|
|        | Contralateral hippocampus   | -0.181 | 0.472 | -0.072 | 0.776 |
|        | Ipsilateral hippocampus     | 0.085  | 0.736 | 0.090  | 0.722 |
|        | Posterior cingulate gyrus   | -0.045 | 0.860 | -0.090 | 0.721 |
|        | Genu of corpus callosum     | 0.031  | 0.902 | -0.013 | 0.959 |
|        | Splenium of corpus callosum | -0.161 | 0.523 | -0.059 | 0.816 |
| MTT(s) |                             |        |       |        |       |
|        | Contralateral frontal lobe  | -0.056 | 0.826 | 0.065  | 0.797 |
|        | Contralateral temporal lobe | -0.008 | 0.976 | 0.069  | 0.787 |
|        | Contralateral hippocampus   | 0.078  | 0.758 | 0.180  | 0.476 |
|        | Ipsilateral hippocampus     | 0.014  | 0.956 | 0.098  | 0.697 |
|        | Posterior cingulate gyrus   | -0.547 | 0.019 | -0.481 | 0.044 |
|        | Genu of corpus callosum     | -0.597 | 0.009 | -0.552 | 0.018 |
|        | Splenium of corpus callosum | -0.240 | 0.338 | -0.389 | 0.111 |
| TTP(s) |                             |        |       |        |       |
|        | Contralateral frontal lobe  | -0.027 | 0.915 | 0.051  | 0.841 |
|        | Contralateral temporal lobe | -0.176 | 0.485 | -0.124 | 0.624 |
|        | Contralateral hippocampus   | 0.018  | 0.942 | 0.011  | 0.965 |
|        | Ipsilateral hippocampus     | 0.074  | 0.770 | 0.206  | 0.412 |
|        | Posterior cingulate gyrus   | -0.583 | 0.011 | -0.513 | 0.030 |
|        | Genu of corpus callosum     | -0.307 | 0.215 | -0.235 | 0.348 |
|        | Splenium of corpus callosum | -0.419 | 0.084 | -0.559 | 0.016 |

r: coefficient of correlation, Dmax: Maximum dose, Dmean: Mean dose, FA: Fractional anisotropy fractional anisotropy, rCBF: regional cerebral blood flow, rCBV: regional cerebral blood volume, MTT: mean transit time, TTP: time to peak

Table S3 Correlation analysis between parameters of DTI and PWI and dose to brain regions(6 months after radiotherapy)

| Parameters         | Location                    | Dmax   |       | Dmean  |       |
|--------------------|-----------------------------|--------|-------|--------|-------|
|                    |                             | r      | P     | r      | P     |
| FA                 |                             |        |       |        |       |
|                    | Contralateral frontal lobe  | -0.305 | 0.218 | -0.328 | 0.183 |
|                    | Contralateral temporal lobe | 0.073  | 0.773 | 0.077  | 0.762 |
|                    | Contralateral hippocampus   | 0.324  | 0.190 | 0.312  | 0.207 |
|                    | Ipsilateral hippocampus     | -0.477 | 0.045 | -0.397 | 0.103 |
|                    | Posterior cingulate gyrus   | -0.576 | 0.012 | -0.608 | 0.007 |
|                    | Genu of corpus callosum     | -0.339 | 0.168 | -0.387 | 0.113 |
|                    | Splenium of corpus callosum | -0.222 | 0.375 | -0.257 | 0.304 |
| rCBV (ml/100g)     |                             |        |       |        |       |
|                    | Contralateral frontal lobe  | 0.232  | 0.353 | 0.329  | 0.182 |
|                    | Contralateral temporal lobe | 0.137  | 0.589 | 0.310  | 0.210 |
|                    | Contralateral hippocampus   | 0.109  | 0.668 | 0.136  | 0.590 |
|                    | Ipsilateral hippocampus     | 0.432  | 0.074 | 0.286  | 0.250 |
|                    | Posterior cingulate gyrus   | 0.136  | 0.589 | 0.107  | 0.674 |
|                    | Genu of corpus callosum     | -0.058 | 0.818 | 0.014  | 0.957 |
|                    | Splenium of corpus callosum | -0.042 | 0.868 | -0.028 | 0.913 |
| rCBF (ml/100g/min) |                             |        |       |        |       |
|                    | Contralateral frontal lobe  | 0.046  | 0.855 | -0.022 | 0.933 |
|                    | Contralateral temporal lobe | -0.179 | 0.477 | -0.103 | 0.684 |

|        |                             |        |       |        |       |
|--------|-----------------------------|--------|-------|--------|-------|
|        | Contralateral hippocampus   | 0.195  | 0.439 | 0.185  | 0.461 |
|        | Ipsilateral hippocampus     | 0.282  | 0.256 | 0.413  | 0.089 |
|        | Posterior cingulate gyrus   | 0.034  | 0.894 | 0.019  | 0.942 |
|        | Genu of corpus callosum     | -0.500 | 0.034 | -0.524 | 0.026 |
|        | Splenium of corpus callosum | 0.102  | 0.687 | 0.223  | 0.374 |
| MTT(s) |                             |        |       |        |       |
|        | Contralateral frontal lobe  | 0.142  | 0.574 | 0.248  | 0.321 |
|        | Contralateral temporal lobe | 0.267  | 0.285 | 0.190  | 0.449 |
|        | Contralateral hippocampus   | 0.084  | 0.739 | 0.185  | 0.463 |
|        | Ipsilateral hippocampus     | 0.580  | 0.145 | 0.126  | 0.619 |
|        | Posterior cingulate gyrus   | 0.034  | 0.893 | 0.050  | 0.844 |
|        | Genu of corpus callosum     | 0.252  | 0.313 | 0.282  | 0.256 |
|        | Splenium of corpus callosum | -0.080 | 0.751 | -0.121 | 0.633 |
| TTP(s) |                             |        |       |        |       |
|        | Contralateral frontal lobe  | 0.256  | 0.306 | 0.336  | 0.173 |
|        | Contralateral temporal lobe | -0.576 | 0.012 | 0.275  | 0.269 |
|        | Contralateral hippocampus   | 0.055  | 0.828 | 0.036  | 0.886 |
|        | Ipsilateral hippocampus     | 0.252  | 0.312 | 0.007  | 0.979 |
|        | Posterior cingulate gyrus   | 0.257  | 0.304 | 0.304  | 0.219 |
|        | Genu of corpus callosum     | 0.367  | 0.134 | 0.432  | 0.074 |
|        | Splenium of corpus callosum | -0.054 | 0.833 | -0.104 | 0.681 |

r: coefficient of correlation, Dmax: Maximum dose, Dmean: Mean dose, FA: Fractional anisotropy fractional anisotropy, rCBF: regional cerebral blood flow, rCBV: regional cerebral blood volume, MTT: mean transit time, TTP: time to peak

Table S4 Correlation analysis between parameters of DTI and PWI and dose to brain regions(9 months after radiotherapy)

| Parameters         | Location                    | Dmax   |       | Dmean  |       |
|--------------------|-----------------------------|--------|-------|--------|-------|
|                    |                             | r      | P     | r      | P     |
| FA                 |                             |        |       |        |       |
|                    | Contralateral frontal lobe  | -0.001 | 0.998 | -0.128 | 0.613 |
|                    | Contralateral temporal lobe | 0.286  | 0.251 | 0.299  | 0.229 |
|                    | Contralateral hippocampus   | 0.530  | 0.150 | 0.380  | 0.120 |
|                    | Ipsilateral hippocampus     | -0.339 | 0.168 | -0.195 | 0.437 |
|                    | Posterior cingulate gyrus   | -0.112 | 0.657 | -0.146 | 0.563 |
|                    | Genu of corpus callosum     | -0.075 | 0.767 | -0.154 | 0.541 |
|                    | Splenium of corpus callosum | -0.237 | 0.344 | -0.219 | 0.383 |
| rCBV (ml/100g)     |                             |        |       |        |       |
|                    | Contralateral frontal lobe  | 0.083  | 0.744 | 0.303  | 0.221 |
|                    | Contralateral temporal lobe | 0.081  | 0.748 | 0.320  | 0.195 |
|                    | Contralateral hippocampus   | 0.240  | 0.338 | 0.276  | 0.268 |
|                    | Ipsilateral hippocampus     | 0.422  | 0.081 | 0.384  | 0.115 |
|                    | Posterior cingulate gyrus   | 0.123  | 0.626 | 0.057  | 0.822 |
|                    | Genu of corpus callosum     | -0.117 | 0.643 | -0.050 | 0.843 |
|                    | Splenium of corpus callosum | -0.313 | 0.206 | -0.304 | 0.221 |
| rCBF (ml/100g/min) |                             |        |       |        |       |
|                    | Contralateral frontal lobe  | 0.015  | 0.951 | -0.169 | 0.502 |
|                    | Contralateral temporal lobe | 0.081  | 0.748 | -0.097 | 0.701 |



|        |                             |        |       |        |       |
|--------|-----------------------------|--------|-------|--------|-------|
|        | Contralateral hippocampus   | 0.271  | 0.276 | 0.289  | 0.245 |
|        | Ipsilateral hippocampus     | 0.120  | 0.635 | 0.190  | 0.451 |
|        | Posterior cingulate gyrus   | 0.220  | 0.381 | 0.168  | 0.506 |
|        | Genu of corpus callosum     | -0.653 | 0.003 | -0.681 | 0.002 |
|        | Splenium of corpus callosum | -0.002 | 0.995 | 0.102  | 0.687 |
| MTT(s) |                             |        |       |        |       |
|        | Contralateral frontal lobe  | 0.017  | 0.945 | 0.194  | 0.442 |
|        | Contralateral temporal lobe | 0.202  | 0.422 | 0.233  | 0.353 |
|        | Contralateral hippocampus   | 0.085  | 0.737 | 0.185  | 0.462 |
|        | Ipsilateral hippocampus     | 0.263  | 0.292 | 0.178  | 0.479 |
|        | Posterior cingulate gyrus   | -0.126 | 0.618 | -0.086 | 0.734 |
|        | Genu of corpus callosum     | 0.266  | 0.287 | 0.319  | 0.196 |
|        | Splenium of corpus callosum | 0.228  | 0.362 | 0.176  | 0.484 |
| TTP(s) |                             |        |       |        |       |
|        | Contralateral frontal lobe  | -0.124 | 0.624 | -0.047 | 0.852 |
|        | Contralateral temporal lobe | 0.237  | 0.343 | 0.021  | 0.934 |
|        | Contralateral hippocampus   | 0.028  | 0.911 | 0.018  | 0.943 |
|        | Ipsilateral hippocampus     | 0.225  | 0.370 | 0.120  | 0.635 |
|        | Posterior cingulate gyrus   | 0.085  | 0.737 | 0.135  | 0.592 |
|        | Genu of corpus callosum     | 0.242  | 0.334 | 0.306  | 0.217 |
|        | Splenium of corpus callosum | 0.146  | 0.564 | 0.093  | 0.714 |

r: coefficient of correlation, Dmax: Maximum dose, Dmean: Mean dose, FA: Fractional anisotropy fractional anisotropy, rCBF: regional cerebral blood flow, rCBV: regional cerebral blood volume, MTT: mean transit time, TTP: time to peak

Table S5 Correlation analysis between parameters of DTI and PWI and dose to brain regions(12 months after radiotherapy)

| Parameters         | Location                    | Dmax   |        | Dmean  |        |
|--------------------|-----------------------------|--------|--------|--------|--------|
|                    |                             | r      | P      | r      | P      |
| FA                 |                             |        |        |        |        |
|                    | Contralateral frontal lobe  | -0.590 | 0.010  | -0.504 | 0.033  |
|                    | Contralateral temporal lobe | 0.157  | 0.535  | 0.177  | 0.483  |
|                    | Contralateral hippocampus   | 0.305  | 0.219  | 0.365  | 0.136  |
|                    | Ipsilateral hippocampus     | -0.203 | 0.420  | -0.322 | 0.192  |
|                    | Posterior cingulate gyrus   | -0.816 | <0.001 | -0.800 | <0.001 |
|                    | Genu of corpus callosum     | -0.395 | 0.105  | -0.450 | 0.061  |
|                    | Splenium of corpus callosum | -0.204 | 0.416  | -0.222 | 0.377  |
| rCBV (ml/100g)     |                             |        |        |        |        |
|                    | Contralateral frontal lobe  | -0.237 | 0.344  | 0.051  | 0.840  |
|                    | Contralateral temporal lobe | 0.090  | 0.722  | 0.335  | 0.174  |
|                    | Contralateral hippocampus   | 0.790  | 0.121  | 0.420  | 0.083  |
|                    | Ipsilateral hippocampus     | 0.296  | 0.233  | 0.142  | 0.574  |
|                    | Posterior cingulate gyrus   | -0.311 | 0.209  | -0.273 | 0.273  |
|                    | Genu of corpus callosum     | 0.047  | 0.852  | 0.080  | 0.752  |
|                    | Splenium of corpus callosum | -0.227 | 0.365  | -0.292 | 0.240  |
| rCBF (ml/100g/min) |                             |        |        |        |        |
|                    | Contralateral frontal lobe  | -0.516 | 0.028  | -0.375 | 0.125  |
|                    | Contralateral temporal lobe | -0.108 | 0.669  | -0.068 | 0.788  |

|        |                             |        |       |        |        |
|--------|-----------------------------|--------|-------|--------|--------|
|        | Contralateral hippocampus   | 0.104  | 0.683 | 0.159  | 0.530  |
|        | Ipsilateral hippocampus     | -0.266 | 0.286 | -0.314 | 0.205  |
|        | Posterior cingulate gyrus   | -0.329 | 0.183 | -0.311 | 0.209  |
|        | Genu of corpus callosum     | -0.726 | 0.001 | -0.747 | <0.001 |
|        | Splenium of corpus callosum | 0.181  | 0.473 | 0.215  | 0.392  |
| MTT(s) |                             |        |       |        |        |
|        | Contralateral frontal lobe  | 0.058  | 0.819 | 0.230  | 0.358  |
|        | Contralateral temporal lobe | 0.318  | 0.198 | 0.304  | 0.220  |
|        | Contralateral hippocampus   | 0.085  | 0.737 | 0.185  | 0.462  |
|        | Ipsilateral hippocampus     | 0.296  | 0.234 | 0.217  | 0.387  |
|        | Posterior cingulate gyrus   | 0.157  | 0.533 | 0.177  | 0.482  |
|        | Genu of corpus callosum     | 0.339  | 0.169 | 0.800  | 0.120  |
|        | Splenium of corpus callosum | 0.209  | 0.405 | 0.098  | 0.698  |
| TTP(s) |                             |        |       |        |        |
|        | Contralateral frontal lobe  | -0.023 | 0.927 | 0.087  | 0.730  |
|        | Contralateral temporal lobe | 0.238  | 0.342 | 0.109  | 0.665  |
|        | Contralateral hippocampus   | -0.005 | 0.984 | 0.017  | 0.948  |
|        | Ipsilateral hippocampus     | 0.327  | 0.185 | 0.214  | 0.393  |
|        | Posterior cingulate gyrus   | 0.305  | 0.219 | 0.283  | 0.255  |
|        | Genu of corpus callosum     | 0.200  | 0.426 | 0.223  | 0.374  |
|        | Splenium of corpus callosum | 0.152  | 0.547 | 0.055  | 0.830  |

r: coefficient of correlation, Dmax: Maximum dose, Dmean: Mean dose, FA: Fractional anisotropy fractional anisotropy, rCBF: regional cerebral blood flow, rCBV: regional cerebral blood volume, MTT: mean transit time, TTP: time to peak
